# Supplementary material for: Genome Editing-Mediated Utrophin Upregulation in Duchenne Muscular Dystrophy Stem Cells
Source: PubMed Central journal article supplement — Mol Ther Nucleic Acids. 2020 Aug 29;22:500–9. doi: 10.1016/j.omtn.2020.08.031 (PMC7554652; doi:10.1016/j.omtn.2020.08.031), 2020-08-29

**OMTN, Volume 22**

**Supplemental Information**

**Genome Editing-Mediated Utrophin Upregulation  
in Duchenne Muscular Dystrophy Stem Cells**

**Kasturi Sengupta, Manoj K. Mishra, Emanuele Loro, Melissa J. Spencer, April D. Pyle, and Tejvir S. Khurana**

## **Supplemental Information**

### **Genome editing-mediated Utrophin upregulation in Duchenne Muscular Dystrophy stem cells**

#### **Supplementary Methods**

##### **Off-targets prediction and validation**

To determine the potential off target activity of guide RNAs we have used the COSMID off-target prediction analysis tool (<https://crispr.bme.gatech.edu/>)<sup>43</sup> which rank order the off-target sites based on sequence similarity with the guide RNA provided. Top ranked homologous sites for each guide RNA are PCR amplified and sequenced to screen for any mutation in the genomic DNA of edited clonal cell lines.

##### **Dual sgRNA mediated *UTRNIMTR* deletion efficiency quantification**

To determine the cutting efficiency of the sgRNA pairs tested in this study, we transfected HEK 293T cells with plasmids expressing the SaCas9 and dual sgRNAs (sgRNA 1&3, sgRNA 1&4, sgRNA 2&4 and sgRNA 2&3). Three days after the transfected cells were lysed and PCR screened with *UTRN* forward and reverse primer mentioned before. Equal amount of PCR product and 5  $\mu$ l of TrackIT 100 bp DNA ladder were run on 2% agarose gel. The gel image was captured using a G:Box imaging system (SYNGENE). Both unedited and *UTRN* $\Delta$ *IMTR* edited PCR products in each lane were quantified using ImageJ software v2.0 in reference with the appropriate size DNA ladder band in the same gel. Deletion efficiency of each pair of sgRNA were shown as percentage of number of DNA copies in edited PCR product normalized with DNA copies in the total PCR product.

##### **Utrophin protein expression in hiPSC differentiated myotubes**

The wild type, unedited DMD and the edited *UTRNΔIMTR* hiPSC cell lines were differentiated by MyoD overexpression and total 10 μg cell protein extracts were loaded for utrophin western blotting. α-Tubulin was used as loading control.

### **Supplementary Figure legends**

#### **Supplementary Figure 1. *UTRNIMTR* Deletion efficiency of sgRNA pairs**

The DNA gel shows PCR product from unedited and *UTRNΔIMTR* edited genome in HEK 293T cells transfected with SaCas9 and different sgRNA pairs. The sgRNA pair 1&4 shows maximum deletion efficiency (56%).

#### **Supplementary Figure 2. Expression of β-dystroglycan (β-DG) in differentiated myotubes**

Wild type, DMD and *UTRNΔIMTR* myotubes were stained with mouse anti β-DG (green) and DAPI (blue). Scale bar = 200 μm. The wild type myotubes show higher expression of cytoplasmic β-DG. In absence of dystrophin, the DMD myotubes show lack of β-DG staining. Whereas, *UTRNΔIMTR* myotubes show restoration of β-DG expression compared with the DMD myotubes.

#### **Supplementary Figure 3. SaCas9-GFP-SgRNA1&4 plasmid map**

The plasmid map shows expression cassette SaCas9 with C-terminal EGFP transgene under EF1-α promoter. The guide RNA pairs are cloned under U6 promoter.

#### **Supplementary Figure 4. Utrophin protein expression in hiPSC differentiated myotubes**

Utrophin expression in wild type, DMD and *UTRNΔIMTR* hiPSC cell line derived myotubes were quantified by western blotting. A. Representative western blot shows expression of utrophin in wild type, DMD and edited *UTRNΔIMTR* hiPSC differentiated myotubes. α-Tubulin was used as loading control. B. Densitometric analysis of the utrophin western blot to quantify utrophin expression in the myotubes. Bars represent mean ± SEM (Mean from three different

experiments with three different wells each, n=9). Difference in utrophin expression between DMD and *UTRNA*ΔIMTR myotubes were statistically analyzed by Kruskal-Wallis test (\*P=0.04).

## Supplementary Tables

**Table S1. Oligonucleotide sequences for guide RNAs cloning**

| Name | Guide RNA Sequence         | Sense Oligo (5'-3')             | Antisense oligo (5'-3')        |
|------|----------------------------|---------------------------------|--------------------------------|
| sg1  | TCTATGTCACTGCT<br>TCTACAG  | CACCGTCTATGTCACTGC<br>TTCTACAG  | AAACCTGTAGAAGCAGT<br>GACATAGAC |
| sg2  | GGTACCTCCACCT<br>ACATCTTT  | CACCGGGTACCTCCACCT<br>ACATCTTT  | AAACAAAGATGTAGGTG<br>GAGGTACCC |
| sg3  | CATAAAGCAGTTT<br>CCAATGCA  | CACCGCATAAAGCAGTT<br>TCCAATGCA  | AAACTGCATTGGAAACT<br>GCTTTATGC |
| sg4  | GAAGACACCAAAT<br>CTACAACCT | CACCGGAAGACACCAAA<br>TCTACAACCT | AAACAGTTGTAGATTTG<br>GTGTCTTCC |

**Table S2. Off-target sites of guide RNA1.**

|   | Chromosome position       | Query type | Mismatch | Cut site  | COSMID Score |
|---|---------------------------|------------|----------|-----------|--------------|
| 1 | Chr12:111687717-111687742 | Del 9      | 2        | 111687733 | 1.68         |
| 2 | Chr6:145581830-145581855  | Del 9      | 2        | 145581846 | 1.85         |
| 3 | Chr4:97683403-97683428    | Del 14     | 2        | 97683412  | 2.99         |
| 4 | Chr4:97683403-97683428    | Del 12     | 2        | 97683412  | 2.99         |
| 5 | Chr7:118654093-118654118  | Del 19     | 2        | 118654109 | 6.81         |

**Table S3. Off-target sites of guide RNA4.**

|   | Chromosome position      | Query type | Mismatch | Cut site  | COSMID Score |
|---|--------------------------|------------|----------|-----------|--------------|
| 1 | Chr6:47204675-47204701   | No indel   | 3        | 47204692  | 1.1          |
| 2 | Chr5:32834524-32834549   | Del 18     | 2        | 32834540  | 1.57         |
| 3 | Chr1:180279087-180279114 | Ins 18     | 2        | 180279105 | 2.14         |
| 4 | Chr5:26710353-26710380   | Ins 11     | 2        | 26710371  | 5.32         |
| 5 | Chr15:82779792-82779818  | No indel   | 3        | 82779801  | 5.85         |

**Table S4. Primer sequences used for off-target sites PCR amplification.**

| Target             | Forward primer (5'-3') | Reverse primer (5'-3') |
|--------------------|------------------------|------------------------|
| Off-target1/sgRNA1 | AGTAGCACCTCTCCCCAGG    | CTGAGGCAGGAAGCTTGAA    |

|                      |                          |                           |
|----------------------|--------------------------|---------------------------|
|                      | T                        | C                         |
| Off-target2/sgRNA1   | TTGCAATTGTTTTTGGCATC     | CTATGCCCAAATAGCCAAG<br>G  |
| Off-target3/4/sgRNA1 | ACAATGAGCCCTTACCCAG<br>A | GCATCTCGTGTCTCAACAT<br>CA |
| Off-target5/sgRNA 1  | GCCAGGAAGTCCAAGATCA<br>G | GCAAACATCGTTTTGTGAA<br>GG |
| Off-target1/sgRNA 4  | TGCACACAAGGTAAGCCAA<br>A | GAACCAGGGGAGTGATCTG<br>A  |
| Off-target2/sgRNA 4  | CCCTCATCACAGGCAGTTT<br>T | TTCACTCGGTGTTTCTGACG      |
| Off-target3/sgRNA 4  | AAAAAGACCCACCCATCCT<br>T | CAACAGCGCAAGACTCTGT<br>C  |
| Off-target4/sgRNA 4  | CTGATGCCACCTGCTAAG<br>T  | GGCTGTGGTGAGCCATTAT<br>T  |
| Off-target5/sgRNA 4  | TGCAGTGAGCTGAGACCTT<br>G | AGGGCTAGTAGGGAGCGTG<br>T  |

**Table S5. Primer sequences used for qPCR.**

| Target    | Forward primer (5'-3') | Reverse primer (5'-3') |
|-----------|------------------------|------------------------|
| MyoD1     | TACCCAAGGTGGAGATCCTG   | ATAGATCATGGGCGGTTTCAG  |
| NANOG     | CAAAGGCAAACAACCCACTT   | TCTGCTGGAGGCTGAGGTAT   |
| MyoG      | CAGTGCCATCCAGTACATCG   | AGGTTGTGGGCATCTGTAGG   |
| MyoD1endo | CCAAGGTGGAGATCCTG      | CCGCTGTAGTCCATCATGC    |
| GAPDH     | GAGTCAACGGATTTGGTCGT   | GACAAGCTTCCCGTTCTCAG   |

#### Supplemental References

1. Cradick, TJ, Qiu, P, Lee, CM, Fine, EJ, and Bao, G (2014). COSMID: A Web-based Tool for Identifying and Validating CRISPR/Cas Off-target Sites. *Mol Ther Nucleic Acids*3: e214.

Supplementary Figure 1

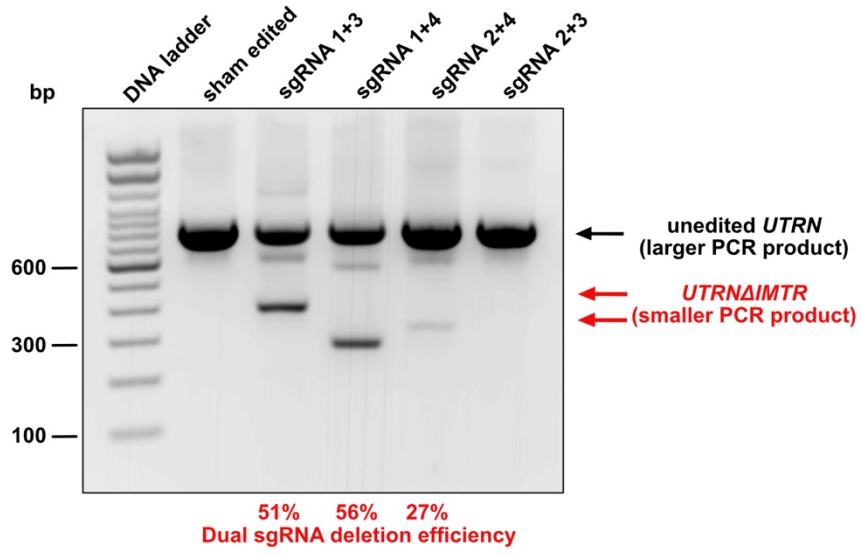

Supplementary Figure 2

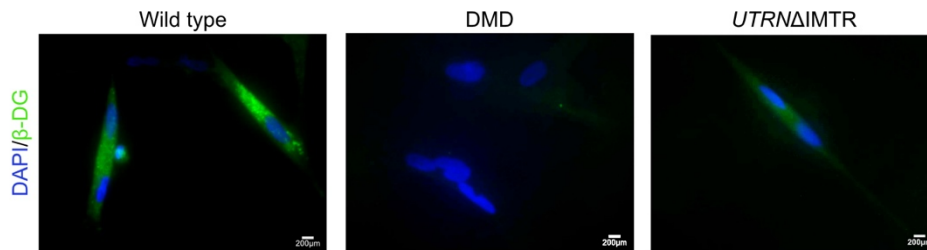

Supplementary Figure 3

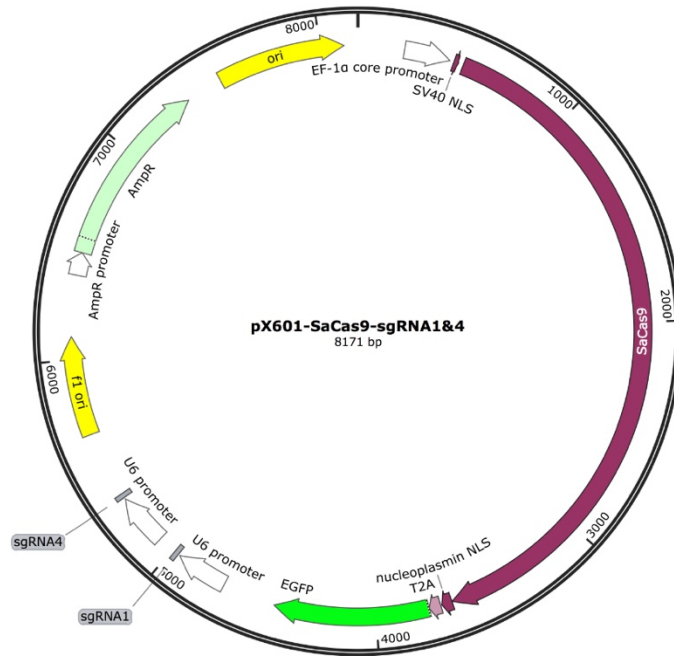

Supplement: mmc1.pdf [file mmc1.pdf]
